# Supplementary material for: De Novo Assembly and Comparative Transcriptome Analyses of Red and Green Morphs of Sweet Basil Grown in Full Sunlight
Source: PLoS One. 2016 Aug 2;11(8):e0160370. doi: 10.1371/journal.pone.0160370 (PMC4970699; doi:10.1371/journal.pone.0160370)
Supplement: S6 Table — (XLSX) [file pone.0160370.s017.xlsx]

## Sheet: Foglio1
S6 Table. Gene-ontology functional enrichment analysis of the DEGs.
GO Term	Name	Type	FDR	single test p-Value	# in test group	# in reference group	# non annot test	# non annot reference group	Over/Under
GO:0030529	ribonucleoprotein complex	Cellular Component	2,0E-6	4,2E-10	47	467	349	10829	OVER
GO:0044391	ribosomal subunit	Cellular Component	2,4E-6	1,0E-9	16	54	380	11242	OVER
GO:0015935	small ribosomal subunit	Cellular Component	3,1E-6	2,0E-9	14	40	382	11256	OVER
GO:0005840	ribosome	Cellular Component	1,0E-5	9,4E-9	37	348	359	10948	OVER
GO:0003735	structural constituent of ribosome	Molecular Function	1,0E-5	1,1E-8	34	302	362	10994	OVER
GO:0005198	structural molecule activity	Molecular Function	1,2E-4	1,6E-7	37	392	359	10904	OVER
GO:0016872	intramolecular lyase activity	Molecular Function	1,3E-3	2,0E-6	6	7	390	11289	OVER
GO:0022627	cytosolic small ribosomal subunit	Cellular Component	1,3E-3	2,2E-6	5	3	391	11293	OVER
GO:0009813	flavonoid biosynthetic process	Biological Process	3,4E-3	8,3E-6	8	24	388	11272	OVER
GO:0043228	non-membrane-bounded organelle	Cellular Component	3,4E-3	8,3E-6	51	737	345	10559	OVER
GO:0043232	intracellular non-membrane-bounded organelle	Cellular Component	3,4E-3	8,3E-6	51	737	345	10559	OVER
GO:0016740	transferase activity	Molecular Function	3,4E-3	8,8E-6	48	2366	348	8930	UNDER
GO:0009812	flavonoid metabolic process	Biological Process	3,6E-3	1,1E-5	8	25	388	11271	OVER
GO:0006412	translation	Biological Process	3,6E-3	1,1E-5	40	522	356	10774	OVER
GO:0016772	transferase activity, transferring phosphorus-containing groups	Molecular Function	6,9E-3	2,2E-5	23	1405	373	9891	UNDER
GO:0005618	cell wall	Cellular Component	1,0E-2	3,6E-5	14	102	382	11194	OVER
GO:0042274	ribosomal small subunit biogenesis	Biological Process	1,0E-2	3,9E-5	3	0	393	11296	OVER
GO:0004834	tryptophan synthase activity	Molecular Function	1,0E-2	3,9E-5	3	0	393	11296	OVER
GO:0045430	chalcone isomerase activity	Molecular Function	1,0E-2	4,2E-5	4	3	392	11293	OVER
GO:0030312	external encapsulating structure	Cellular Component	1,5E-2	6,4E-5	14	108	382	11188	OVER
GO:0016762	xyloglucan:xyloglucosyl transferase activity	Molecular Function	1,5E-2	6,8E-5	6	16	390	11280	OVER
GO:0032991	macromolecular complex	Cellular Component	2,5E-2	1,2E-4	72	1288	324	10008	OVER
GO:0090304	nucleic acid metabolic process	Biological Process	4,1E-2	2,0E-4	20	1181	376	10115	UNDER
GO:0004672	protein kinase activity	Molecular Function	4,3E-2	2,2E-4	10	784	386	10512	UNDER
GO:0016853	isomerase activity	Molecular Function	5,2E-2	2,8E-4	16	158	380	11138	OVER
GO:0016301	kinase activity	Molecular Function	5,2E-2	2,9E-4	19	1135	377	10161	UNDER
GO:0016773	phosphotransferase activity, alcohol group as acceptor	Molecular Function	5,6E-2	3,2E-4	14	928	382	10368	UNDER
GO:0016310	phosphorylation	Biological Process	5,7E-2	3,4E-4	17	1038	379	10258	UNDER
GO:0009411	response to UV	Biological Process	7,0E-2	4,3E-4	6	24	390	11272	OVER
GO:0009718	anthocyanin-containing compound biosynthetic process	Biological Process	8,1E-2	5,2E-4	4	8	392	11288	OVER
GO:0006568	tryptophan metabolic process	Biological Process	1,0E-1	7,1E-4	5	17	391	11279	OVER
GO:0006586	indolalkylamine metabolic process	Biological Process	1,0E-1	7,1E-4	5	17	391	11279	OVER
GO:0045552	dihydrokaempferol 4-reductase activity	Molecular Function	1,0E-1	7,1E-4	3	3	393	11293	OVER
GO:0046283	anthocyanin-containing compound metabolic process	Biological Process	1,0E-1	7,3E-4	4	9	392	11287	OVER
GO:0010224	response to UV-B	Biological Process	1,3E-1	9,9E-4	4	10	392	11286	OVER
GO:0043021	ribonucleoprotein complex binding	Molecular Function	1,3E-1	9,9E-4	4	10	392	11286	OVER
GO:0042430	indole-containing compound metabolic process	Biological Process	1,4E-1	1,1E-3	5	19	391	11277	OVER
GO:0048046	apoplast	Cellular Component	1,4E-1	1,2E-3	10	83	386	11213	OVER
GO:0046219	indolalkylamine biosynthetic process	Biological Process	1,4E-1	1,2E-3	3	4	393	11292	OVER
GO:0000162	tryptophan biosynthetic process	Biological Process	1,4E-1	1,2E-3	3	4	393	11292	OVER
GO:0044445	cytosolic part	Cellular Component	1,6E-1	1,4E-3	6	31	390	11265	OVER
GO:0043412	macromolecule modification	Biological Process	1,6E-1	1,4E-3	25	1268	371	10028	UNDER
GO:0006468	protein phosphorylation	Biological Process	1,8E-1	1,6E-3	10	687	386	10609	UNDER
GO:0022626	cytosolic ribosome	Cellular Component	2,0E-1	1,9E-3	5	22	391	11274	OVER
GO:1901576	organic substance biosynthetic process	Biological Process	2,2E-1	2,1E-3	99	2106	297	9190	OVER
GO:0016836	hydro-lyase activity	Molecular Function	2,7E-1	2,7E-3	6	36	390	11260	OVER
GO:0006576	cellular biogenic amine metabolic process	Biological Process	2,7E-1	2,7E-3	6	36	390	11260	OVER
GO:0009269	response to desiccation	Biological Process	2,7E-1	2,8E-3	3	6	393	11290	OVER
GO:0044106	cellular amine metabolic process	Biological Process	2,9E-1	3,1E-3	6	37	390	11259	OVER
GO:0031647	regulation of protein stability	Biological Process	2,9E-1	3,4E-3	2	1	394	11295	OVER
GO:0006740	NADPH regeneration	Biological Process	2,9E-1	3,4E-3	2	1	394	11295	OVER
GO:0009780	photosynthetic NADP+ reduction	Biological Process	2,9E-1	3,4E-3	2	1	394	11295	OVER
GO:0050821	protein stabilization	Biological Process	2,9E-1	3,4E-3	2	1	394	11295	OVER
GO:0030093	chloroplast photosystem I	Cellular Component	2,9E-1	3,4E-3	2	1	394	11295	OVER
GO:0042550	photosystem I stabilization	Biological Process	2,9E-1	3,4E-3	2	1	394	11295	OVER
GO:0016877	ligase activity, forming carbon-sulfur bonds	Molecular Function	3,0E-1	3,6E-3	5	26	391	11270	OVER
GO:0045229	external encapsulating structure organization	Biological Process	3,0E-1	3,6E-3	13	150	383	11146	OVER
GO:0042435	indole-containing compound biosynthetic process	Biological Process	3,3E-1	4,1E-3	4	16	392	11280	OVER
GO:0019344	cysteine biosynthetic process	Biological Process	3,4E-1	4,4E-3	7	54	389	11242	OVER
GO:0006457	protein folding	Biological Process	3,4E-1	4,4E-3	15	186	381	11110	OVER
GO:0016835	carbon-oxygen lyase activity	Molecular Function	3,4E-1	4,4E-3	8	69	388	11227	OVER
GO:0006793	phosphorus metabolic process	Biological Process	3,4E-1	4,5E-3	38	1656	358	9640	UNDER
GO:1902589	single-organism organelle organization	Biological Process	3,5E-1	4,8E-3	2	292	394	11004	UNDER
GO:0006534	cysteine metabolic process	Biological Process	3,5E-1	4,8E-3	7	55	389	11241	OVER
GO:0043022	ribosome binding	Molecular Function	3,8E-1	5,2E-3	3	8	393	11288	OVER
GO:0005576	extracellular region	Cellular Component	3,8E-1	5,3E-3	15	192	381	11104	OVER
GO:0006796	phosphate-containing compound metabolic process	Biological Process	3,8E-1	5,4E-3	38	1640	358	9656	UNDER
GO:0006464	cellular protein modification process	Biological Process	3,8E-1	5,5E-3	25	1187	371	10109	UNDER
GO:0036211	protein modification process	Biological Process	3,8E-1	5,5E-3	25	1187	371	10109	UNDER
GO:0004674	protein serine/threonine kinase activity	Molecular Function	3,8E-1	5,6E-3	8	555	388	10741	UNDER
GO:0009070	serine family amino acid biosynthetic process	Biological Process	3,8E-1	5,7E-3	7	57	389	11239	OVER
GO:0009058	biosynthetic process	Biological Process	3,8E-1	5,8E-3	101	2227	295	9069	OVER
GO:0071555	cell wall organization	Biological Process	3,9E-1	6,1E-3	12	142	384	11154	OVER
GO:0008270	zinc ion binding	Molecular Function	3,9E-1	6,2E-3	6	473	390	10823	UNDER
GO:0016070	RNA metabolic process	Biological Process	3,9E-1	6,2E-3	16	857	380	10439	UNDER
GO:0042255	ribosome assembly	Biological Process	4,1E-1	6,6E-3	2	2	394	11294	OVER
GO:0009073	aromatic amino acid family biosynthetic process	Biological Process	4,2E-1	6,9E-3	4	19	392	11277	OVER
GO:0006886	intracellular protein transport	Biological Process	4,7E-1	7,8E-3	3	329	393	10967	UNDER
GO:0051649	establishment of localization in cell	Biological Process	4,8E-1	8,0E-3	6	452	390	10844	UNDER
GO:0051510	regulation of unidimensional cell growth	Biological Process	5,0E-1	8,6E-3	3	10	393	11286	OVER
GO:0098807	chloroplast thylakoid membrane protein complex	Cellular Component	5,8E-1	1,1E-2	2	3	394	11293	OVER
GO:0004764	shikimate 3-dehydrogenase (NADP+) activity	Molecular Function	5,8E-1	1,1E-2	2	3	394	11293	OVER
GO:0030151	molybdenum ion binding	Molecular Function	5,8E-1	1,1E-2	2	3	394	11293	OVER
GO:0004512	inositol-3-phosphate synthase activity	Molecular Function	5,8E-1	1,1E-2	2	3	394	11293	OVER
GO:0006021	inositol biosynthetic process	Biological Process	5,8E-1	1,1E-2	2	3	394	11293	OVER
GO:0003855	3-dehydroquinate dehydratase activity	Molecular Function	5,8E-1	1,1E-2	2	3	394	11293	OVER
GO:0032259	methylation	Biological Process	5,8E-1	1,1E-2	1	205	395	11091	UNDER
GO:0006605	protein targeting	Biological Process	5,8E-1	1,1E-2	1	209	395	11087	UNDER
GO:0032501	multicellular organismal process	Biological Process	5,8E-1	1,1E-2	6	447	390	10849	UNDER
GO:0004553	hydrolase activity, hydrolyzing O-glycosyl compounds	Molecular Function	5,8E-1	1,1E-2	13	170	383	11126	OVER
GO:0009522	photosystem I	Cellular Component	6,3E-1	1,2E-2	6	51	390	11245	OVER
GO:1901607	alpha-amino acid biosynthetic process	Biological Process	6,3E-1	1,2E-2	12	149	384	11147	OVER
GO:0042401	cellular biogenic amine biosynthetic process	Biological Process	6,4E-1	1,3E-2	3	12	393	11284	OVER
GO:0001558	regulation of cell growth	Biological Process	6,4E-1	1,3E-2	3	12	393	11284	OVER
GO:0009309	amine biosynthetic process	Biological Process	6,4E-1	1,3E-2	3	12	393	11284	OVER
GO:0016878	acid-thiol ligase activity	Molecular Function	6,7E-1	1,4E-2	4	24	392	11272	OVER
GO:0016405	CoA-ligase activity	Molecular Function	6,7E-1	1,4E-2	4	24	392	11272	OVER
GO:0005488	binding	Molecular Function	6,7E-1	1,4E-2	174	5683	222	5613	UNDER
GO:0072594	establishment of protein localization to organelle	Biological Process	7,0E-1	1,5E-2	0	135	396	11161	UNDER
GO:0006621	protein retention in ER lumen	Biological Process	7,0E-1	1,6E-2	3	13	393	11283	OVER
GO:0022604	regulation of cell morphogenesis	Biological Process	7,0E-1	1,6E-2	3	13	393	11283	OVER
GO:0005048	signal sequence binding	Molecular Function	7,0E-1	1,6E-2	3	13	393	11283	OVER
GO:0046923	ER retention sequence binding	Molecular Function	7,0E-1	1,6E-2	3	13	393	11283	OVER
GO:0035437	maintenance of protein localization in endoplasmic reticulum	Biological Process	7,0E-1	1,6E-2	3	13	393	11283	OVER
GO:0009072	aromatic amino acid family metabolic process	Biological Process	7,0E-1	1,6E-2	6	54	390	11242	OVER
GO:1902580	single-organism cellular localization	Biological Process	7,0E-1	1,6E-2	1	197	395	11099	UNDER
GO:0003824	catalytic activity	Molecular Function	7,0E-1	1,6E-2	186	6013	210	5283	UNDER
GO:1901617	organic hydroxy compound biosynthetic process	Biological Process	7,0E-1	1,6E-2	8	88	388	11208	OVER
GO:0046496	nicotinamide nucleotide metabolic process	Biological Process	7,2E-1	1,7E-2	12	160	384	11136	OVER
GO:0009308	amine metabolic process	Biological Process	7,2E-1	1,7E-2	6	55	390	11241	OVER
GO:0051082	unfolded protein binding	Molecular Function	7,2E-1	1,7E-2	9	107	387	11189	OVER
GO:0019362	pyridine nucleotide metabolic process	Biological Process	7,2E-1	1,7E-2	12	161	384	11135	OVER
GO:0003676	nucleic acid binding	Molecular Function	7,4E-1	1,8E-2	36	1482	360	9814	UNDER
GO:0042277	peptide binding	Molecular Function	7,4E-1	1,8E-2	3	14	393	11282	OVER
GO:0042023	DNA endoreduplication	Biological Process	7,4E-1	1,8E-2	3	14	393	11282	OVER
GO:0004774	succinate-CoA ligase activity	Molecular Function	7,4E-1	1,8E-2	3	14	393	11282	OVER
GO:0044786	cell cycle DNA replication	Biological Process	7,4E-1	1,8E-2	3	14	393	11282	OVER
GO:0072524	pyridine-containing compound metabolic process	Biological Process	7,5E-1	1,9E-2	12	164	384	11132	OVER
GO:0022414	reproductive process	Biological Process	7,5E-1	1,9E-2	2	246	394	11050	UNDER
GO:0016829	lyase activity	Molecular Function	7,6E-1	1,9E-2	12	165	384	11131	OVER
GO:0006733	oxidoreduction coenzyme metabolic process	Biological Process	8,1E-1	2,1E-2	12	167	384	11129	OVER
GO:0033764	steroid dehydrogenase activity, acting on the CH-OH group of donors, NAD or NADP as acceptor	Molecular Function	8,2E-1	2,1E-2	2	5	394	11291	OVER
GO:0003854	3-beta-hydroxy-delta5-steroid dehydrogenase activity	Molecular Function	8,2E-1	2,1E-2	2	5	394	11291	OVER
GO:0072595	maintenance of protein localization in organelle	Biological Process	8,2E-1	2,2E-2	3	15	393	11281	OVER
GO:0048367	shoot system development	Biological Process	8,4E-1	2,2E-2	1	182	395	11114	UNDER
GO:0006399	tRNA metabolic process	Biological Process	8,4E-1	2,3E-2	0	125	396	11171	UNDER
GO:0043167	ion binding	Molecular Function	8,4E-1	2,3E-2	102	3513	294	7783	UNDER
GO:0044431	Golgi apparatus part	Cellular Component	8,4E-1	2,4E-2	0	129	396	11167	UNDER
GO:0008652	cellular amino acid biosynthetic process	Biological Process	8,4E-1	2,4E-2	13	181	383	11115	OVER
GO:0000097	sulfur amino acid biosynthetic process	Biological Process	8,4E-1	2,5E-2	8	96	388	11200	OVER
GO:0051224	negative regulation of protein transport	Biological Process	8,4E-1	2,5E-2	3	16	393	11280	OVER
GO:0051223	regulation of protein transport	Biological Process	8,4E-1	2,5E-2	3	16	393	11280	OVER
GO:0051220	cytoplasmic sequestering of protein	Biological Process	8,4E-1	2,5E-2	3	16	393	11280	OVER
GO:0051051	negative regulation of transport	Biological Process	8,4E-1	2,5E-2	3	16	393	11280	OVER
GO:0033218	amide binding	Molecular Function	8,4E-1	2,5E-2	3	16	393	11280	OVER
GO:0070201	regulation of establishment of protein localization	Biological Process	8,4E-1	2,5E-2	3	16	393	11280	OVER
GO:0044707	single-multicellular organism process	Biological Process	8,4E-1	2,5E-2	6	408	390	10888	UNDER
GO:0046907	intracellular transport	Biological Process	8,4E-1	2,6E-2	6	410	390	10886	UNDER
GO:0071554	cell wall organization or biogenesis	Biological Process	8,4E-1	2,6E-2	13	187	383	11109	OVER
GO:0016168	chlorophyll binding	Molecular Function	8,4E-1	2,6E-2	5	45	391	11251	OVER
GO:0006414	translational elongation	Biological Process	8,4E-1	2,6E-2	5	45	391	11251	OVER
GO:0016788	hydrolase activity, acting on ester bonds	Molecular Function	8,4E-1	2,6E-2	5	360	391	10936	UNDER
GO:0003746	translation elongation factor activity	Molecular Function	8,4E-1	2,7E-2	4	30	392	11266	OVER
GO:0006452	translational frameshifting	Biological Process	8,4E-1	2,8E-2	2	6	394	11290	OVER
GO:0006449	regulation of translational termination	Biological Process	8,4E-1	2,8E-2	2	6	394	11290	OVER
GO:0004619	phosphoglycerate mutase activity	Molecular Function	8,4E-1	2,8E-2	2	6	394	11290	OVER
GO:0045905	positive regulation of translational termination	Biological Process	8,4E-1	2,8E-2	2	6	394	11290	OVER
GO:0045901	positive regulation of translational elongation	Biological Process	8,4E-1	2,8E-2	2	6	394	11290	OVER
GO:0043243	positive regulation of protein complex disassembly	Biological Process	8,4E-1	2,8E-2	2	6	394	11290	OVER
GO:1901566	organonitrogen compound biosynthetic process	Biological Process	8,4E-1	2,9E-2	23	409	373	10887	OVER
GO:0046173	polyol biosynthetic process	Biological Process	8,4E-1	3,0E-2	4	31	392	11265	OVER
GO:0016741	transferase activity, transferring one-carbon groups	Molecular Function	8,4E-1	3,2E-2	1	171	395	11125	UNDER
GO:0022603	regulation of anatomical structure morphogenesis	Biological Process	8,4E-1	3,3E-2	3	18	393	11278	OVER
GO:0010026	trichome differentiation	Biological Process	8,4E-1	3,3E-2	3	18	393	11278	OVER
GO:0061458	reproductive system development	Biological Process	8,4E-1	3,3E-2	1	175	395	11121	UNDER
GO:0048608	reproductive structure development	Biological Process	8,4E-1	3,3E-2	1	175	395	11121	UNDER
GO:0007275	multicellular organismal development	Biological Process	8,4E-1	3,3E-2	6	394	390	10902	UNDER
GO:0006351	transcription, DNA-templated	Biological Process	8,4E-1	3,4E-2	9	511	387	10785	UNDER
GO:0097659	nucleic acid-templated transcription	Biological Process	8,4E-1	3,4E-2	9	511	387	10785	UNDER
GO:0042256	mature ribosome assembly	Biological Process	8,4E-1	3,4E-2	1	0	395	11296	OVER
GO:0000462	maturation of SSU-rRNA from tricistronic rRNA transcript (SSU-rRNA, 5.8S rRNA, LSU-rRNA)	Biological Process	8,4E-1	3,4E-2	1	0	395	11296	OVER
GO:0046677	response to antibiotic	Biological Process	8,4E-1	3,4E-2	1	0	395	11296	OVER
GO:0015645	fatty acid ligase activity	Molecular Function	8,4E-1	3,4E-2	1	0	395	11296	OVER
GO:0006750	glutathione biosynthetic process	Biological Process	8,4E-1	3,4E-2	1	0	395	11296	OVER
GO:0019184	nonribosomal peptide biosynthetic process	Biological Process	8,4E-1	3,4E-2	1	0	395	11296	OVER
GO:0033194	response to hydroperoxide	Biological Process	8,4E-1	3,4E-2	1	0	395	11296	OVER
GO:0050589	leucocyanidin oxygenase activity	Molecular Function	8,4E-1	3,4E-2	1	0	395	11296	OVER
GO:0045176	apical protein localization	Biological Process	8,4E-1	3,4E-2	1	0	395	11296	OVER
GO:0006407	rRNA export from nucleus	Biological Process	8,4E-1	3,4E-2	1	0	395	11296	OVER
GO:0051029	rRNA transport	Biological Process	8,4E-1	3,4E-2	1	0	395	11296	OVER
GO:0008105	asymmetric protein localization	Biological Process	8,4E-1	3,4E-2	1	0	395	11296	OVER
GO:0004776	succinate-CoA ligase (GDP-forming) activity	Molecular Function	8,4E-1	3,4E-2	1	0	395	11296	OVER
GO:0002181	cytoplasmic translation	Biological Process	8,4E-1	3,4E-2	1	0	395	11296	OVER
GO:0004416	hydroxyacylglutathione hydrolase activity	Molecular Function	8,4E-1	3,4E-2	1	0	395	11296	OVER
GO:0004467	long-chain fatty acid-CoA ligase activity	Molecular Function	8,4E-1	3,4E-2	1	0	395	11296	OVER
GO:0000028	ribosomal small subunit assembly	Biological Process	8,4E-1	3,4E-2	1	0	395	11296	OVER
GO:0010335	response to non-ionic osmotic stress	Biological Process	8,4E-1	3,4E-2	1	0	395	11296	OVER
GO:0010311	lateral root formation	Biological Process	8,4E-1	3,4E-2	1	0	395	11296	OVER
GO:0030490	maturation of SSU-rRNA	Biological Process	8,4E-1	3,4E-2	1	0	395	11296	OVER
GO:0010020	chloroplast fission	Biological Process	8,4E-1	3,4E-2	1	0	395	11296	OVER
GO:0010023	proanthocyanidin biosynthetic process	Biological Process	8,4E-1	3,4E-2	1	0	395	11296	OVER
GO:0010025	wax biosynthetic process	Biological Process	8,4E-1	3,4E-2	1	0	395	11296	OVER
GO:0031957	very long-chain fatty acid-CoA ligase activity	Molecular Function	8,4E-1	3,4E-2	1	0	395	11296	OVER
GO:0006982	response to lipid hydroperoxide	Biological Process	8,4E-1	3,4E-2	1	0	395	11296	OVER
GO:0030686	90S preribosome	Cellular Component	8,4E-1	3,4E-2	1	0	395	11296	OVER
GO:0000719	photoreactive repair	Biological Process	8,4E-1	3,4E-2	1	0	395	11296	OVER
GO:0010166	wax metabolic process	Biological Process	8,4E-1	3,4E-2	1	0	395	11296	OVER
GO:0004721	phosphoprotein phosphatase activity	Molecular Function	8,4E-1	3,4E-2	0	111	396	11185	UNDER
GO:1901072	glucosamine-containing compound catabolic process	Biological Process	8,4E-1	3,5E-2	2	7	394	11289	OVER
GO:1901071	glucosamine-containing compound metabolic process	Biological Process	8,4E-1	3,5E-2	2	7	394	11289	OVER
GO:0016711	flavonoid 3'-monooxygenase activity	Molecular Function	8,4E-1	3,5E-2	2	7	394	11289	OVER
GO:0004568	chitinase activity	Molecular Function	8,4E-1	3,5E-2	2	7	394	11289	OVER
GO:0046348	amino sugar catabolic process	Biological Process	8,4E-1	3,5E-2	2	7	394	11289	OVER
GO:0006040	amino sugar metabolic process	Biological Process	8,4E-1	3,5E-2	2	7	394	11289	OVER
GO:0006022	aminoglycan metabolic process	Biological Process	8,4E-1	3,5E-2	2	7	394	11289	OVER
GO:0006026	aminoglycan catabolic process	Biological Process	8,4E-1	3,5E-2	2	7	394	11289	OVER
GO:0006032	chitin catabolic process	Biological Process	8,4E-1	3,5E-2	2	7	394	11289	OVER
GO:0006030	chitin metabolic process	Biological Process	8,4E-1	3,5E-2	2	7	394	11289	OVER
GO:0051651	maintenance of location in cell	Biological Process	8,7E-1	3,7E-2	3	19	393	11277	OVER
GO:0032507	maintenance of protein location in cell	Biological Process	8,7E-1	3,7E-2	3	19	393	11277	OVER
GO:0016192	vesicle-mediated transport	Biological Process	8,7E-1	3,7E-2	3	257	393	11039	UNDER
GO:0044711	single-organism biosynthetic process	Biological Process	8,7E-1	3,7E-2	47	984	349	10312	OVER
GO:0044249	cellular biosynthetic process	Biological Process	9,4E-1	4,1E-2	89	2065	307	9231	OVER
GO:0045185	maintenance of protein location	Biological Process	9,5E-1	4,1E-2	3	20	393	11276	OVER
GO:0030003	cellular cation homeostasis	Biological Process	9,6E-1	4,2E-2	4	35	392	11261	OVER
GO:0044283	small molecule biosynthetic process	Biological Process	9,6E-1	4,2E-2	23	417	373	10879	OVER
GO:0009636	response to toxic substance	Biological Process	9,7E-1	4,3E-2	2	8	394	11288	OVER
GO:0043244	regulation of protein complex disassembly	Biological Process	9,7E-1	4,3E-2	2	8	394	11288	OVER
GO:0016229	steroid dehydrogenase activity	Molecular Function	9,7E-1	4,3E-2	2	8	394	11288	OVER
GO:1901615	organic hydroxy compound metabolic process	Biological Process	9,8E-1	4,4E-2	10	146	386	11150	OVER
GO:0016616	oxidoreductase activity, acting on the CH-OH group of donors, NAD or NADP as acceptor	Molecular Function	9,9E-1	4,5E-2	9	122	387	11174	OVER
GO:0006873	cellular ion homeostasis	Biological Process	1,0E0	4,5E-2	4	36	392	11260	OVER
GO:0055082	cellular chemical homeostasis	Biological Process	1,0E0	4,5E-2	4	36	392	11260	OVER
GO:0043161	proteasome-mediated ubiquitin-dependent protein catabolic process	Biological Process	1,0E0	4,6E-2	3	21	393	11275	OVER
GO:0016791	phosphatase activity	Molecular Function	1,0E0	4,6E-2	1	159	395	11137	UNDER
GO:0009069	serine family amino acid metabolic process	Biological Process	1,0E0	4,6E-2	7	90	389	11206	OVER
GO:0008168	methyltransferase activity	Molecular Function	1,0E0	4,7E-2	1	165	395	11131	UNDER
GO:0044429	mitochondrial part	Cellular Component	1,0E0	4,7E-2	1	165	395	11131	UNDER
GO:0006739	NADP metabolic process	Biological Process	1,0E0	4,8E-2	6	72	390	11224	OVER
GO:0048638	regulation of developmental growth	Biological Process	1,0E0	4,9E-2	4	37	392	11259	OVER
GO:0009941	chloroplast envelope	Cellular Component	1,0E0	4,9E-2	11	159	385	11137	OVER
GO:0098588	bounding membrane of organelle	Cellular Component	1,0E0	5,0E-2	4	295	392	11001	UNDER
