# Supplementary material for: De Novo Assembly and Comparative Transcriptome Analyses of Red and Green Morphs of Sweet Basil Grown in Full Sunlight
Source: PLoS One. 2016 Aug 2;11(8):e0160370. doi: 10.1371/journal.pone.0160370 (PMC4970699; doi:10.1371/journal.pone.0160370)
Supplement: S7 Table — (XLSX) [file pone.0160370.s018.xlsx]

## Sheet: Foglio1
S7 Table. Primer sequences for qRT-PCR.
Gene		Transcript ID		LEFT PRIMER		RIGHT PRIMER	AMPLICON SIZE
Tubulin	TUB	comp19058_c0_seq1	TUB_F	GGAGTGGCAAGCTTAAGGGT	TUB_R	CATCTCCCAAGGTGTCCGAC	148 bp
Chalcone synthase	CHS	comp38911_c0_seq1	CHS_F	CATCATGAAGCGCTTGACGG	CHS_R	AAGGCCATCAAGGAATGGGG	144 bp
Flavonol synthase	FLS	comp39915_c0_seq2	FLS_F	GCTCGAAAAACTCCCTCCCA	FLS_R	GGGGGATCTTCCAAGTGGTG	84 bp
Phenylalanine ammonia-lyase	PAL	comp49544_c0_seq3	PAL_F	GTCCACCACACGGATCAAGT	PAL_R	ACTCTAACAATGGGCGCCAA	75 bp
Leucoanthocyanidin dioxygenase/anthocyanidin synthase	ANS	comp42162_c1_seq3	ANS_F	TAAGATCGTCCATTCCGCCG	ANS_R	CTCGATCCTCTCAATCGGCC	74 bp
Anthocyanidin 3-O-glucosyltransferase	3GT	comp42103_c0_seq1	3GT_F	TCAAGTGTTCTCCGGTGCTC	3GT_R	AGAAAGCTATGGCGGCAGTT	92 bp
Dihydroflavonol reductase	DFR	comp50174_c0_seq6	DFR_F	TGCAGCTATCAATGGCTCCT	DFR_R	GTGGTGCACTTCTCCTCCAA	94 bp
Phytoene synthase	PSY	comp48796_c1_seq3	PSY_F	ATCGGTCCTCCTACACCACA	PSY_R	CCGGGATCTCTTGGCTTGTT	153 bp
Zeaxanthin epoxidase	ZEP	comp50604_c0_seq25	ZEP_F	AGACCAGCCACGAAGTTAGC	ZEP_R	AATGGAGAAATTTGCGCGGG	144 bp
Violaxanthin de-epoxidase	VDE	comp50273_c0_seq2	VDE_F	CGCTTTTGGCAGCCTTTTCT	VDE_R	ATCGAAAACCAACCCGACGA	148 bp
